# Supplementary material for: Reovirus σNS and μNS Proteins Remodel the Endoplasmic Reticulum to Build Replication Neo-Organelles
Source: PubMed Central journal article supplement (PMC6083906; doi:10.1128/mbio.01253-18), 2018-08-07

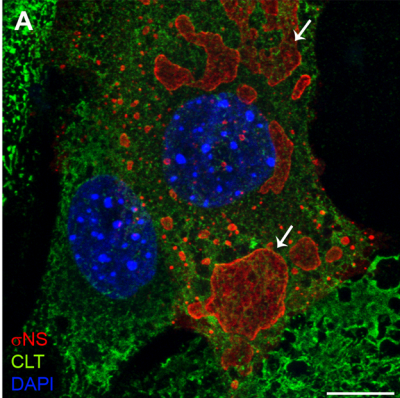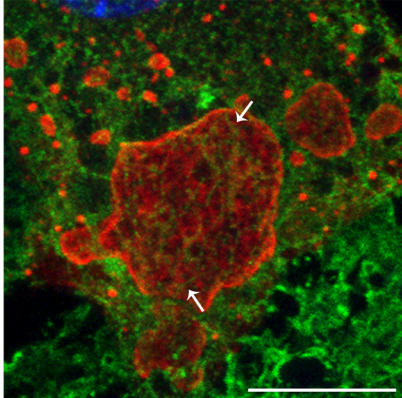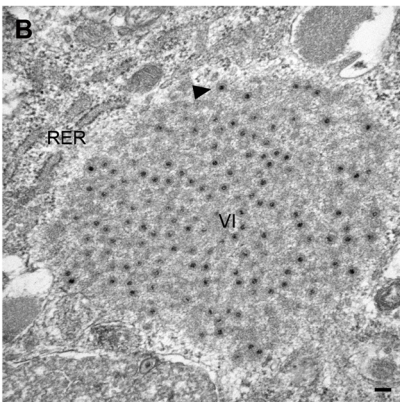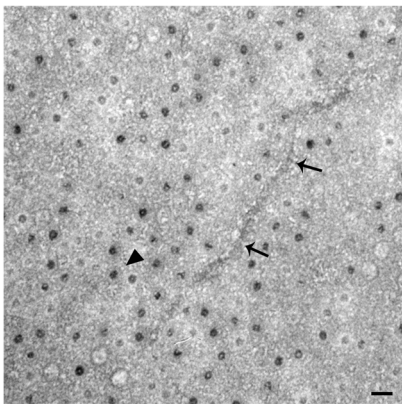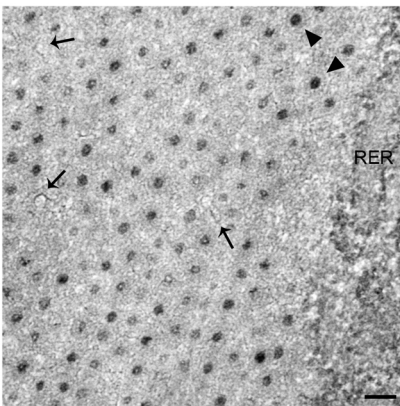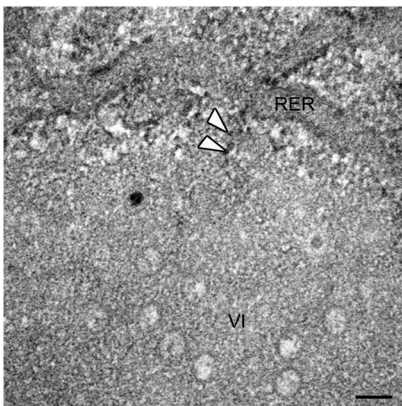

Supplement: mbo004184015sf1.pdf [file mbo004184015sf1.pdf]
